# Supplementary material
Source: PubMed Central journal article supplement (PMC8985210)
Supplement: NIHMS1782172-supplement-SupplementalTable7.pdf [file NIHMS1782172-supplement-SupplementalTable7.pdf]

|                                    | <b>Median number<br/>of SVs</b> | <b>Mean number<br/>of SVs</b> |
|------------------------------------|---------------------------------|-------------------------------|
| Deletions                          | 4573                            | 7315.25                       |
| Duplications                       | 986                             | 977.9688                      |
| Inversions                         | 692                             | 686.3438                      |
| Insertions                         | 0                               | 2.0625                        |
| Translocations                     | 3184.5                          | 3453.75                       |
| Total                              | 9542                            | 12435.375                     |
| Overlap GIAB<br>HG002 truth set    | 1925                            | 1921.4062                     |
| In GIAB high<br>confidence regions | 4430                            | 6964.9375                     |
